# Supplementary material for: Synaptotagmin 1 and Synaptotagmin 7 promote MR1-mediated presentation of Mycobacterium tuberculosis antigens
Source: eLife. 2026 Apr 14;14:RP108318. doi: 10.7554/eLife.108318 (PMC13078786; doi:10.7554/eLife.108318)
Supplement: Figure 1—source data 1. [file elife-108318-fig1-data1.xlsx]

## Sheet: Sheet1
Figure 1a	CT values
Cell line	SYT1			SYT7			GAPDH
BEAS-2B	33.6274	35.9973	34.0079	32.083	34.0132	33.9021	17.9737	19.3635	19.5549
THP-1	33.8277	33.6422	30.0875	35.4088	34.0667	34.2773	21.161	22.6742	23.5617	24.5338
Figure 1b	Syt1 KO				Syt7 KO
	Indel	Percent distribution			Indel	Percent distribution
	-1	47			-14	44
	-21	38			-15	44
	-21	9			-15	4
	-21	2			-14	3
	-21	1			-14	1
Figure 1c	MAIT clone:BEAS-2B
Mtb infected cells (x1,000)	WT			Syt1 KO			Syt7 KO
20	447	336	569	220.5	147.5	262.5	278.5	220.5	254
10	332.5	248.5	412.5	180	109.5	198.5	213.5	158	167.5
5	258	150.5	222	98.5	51.5	120	109	72	82.5
2.5	155	79	155.5	41	27.5	51.5	60.5	47.5	48.5
	HLA-B45-restricted T clone:BEAS-2B
Mtb infected cells (x1,000)	WT			Syt1 KO			Syt7 KO
20	755	842	732.5	689.5	707	636.5	654	719.5	648.5
10	636.5	696.5	625	565.5	602	515.5	522	568.5	568.5
5	464.5	588	488.5	405	410	386.5	376	405.5	378.5
2.5	307	380	302.5	242	255.5	193.5	235.5	234	226
Figure 1d	MAIT clone:BEAS-2B
Msmeg sup titration (uL)	WT			Syt1 KO			Syt7 KO
20	613.5	690.5	502	581	538.5	464.5	545.5	635	387
10	518.5	594	413.5	479	438	340.5	449	501.5	283
5	342.5	393	241	317.5	267	186.5	265	317	129.5
2.5	175.5	210	91.5	148.5	97	80.5	145.5	159	49.5
1.25	88.5	69.5	27	58.5	36	24	55	45.5	12
	HLA-B45-restricted T clone:BEAS-2B
CFP10 pep titration (ng/mL)	WT			Syt1 KO			Syt7 KO
50	709	643.5	483.5	680.5	514.5	358.5	661.5	639.5	414.5
25	644.5	526.5	379	626.5	406	295	662.5	528	343
12.5	571	352.5	323	538.5	242.5	242.5	613	386.5	309.5
6.25	427.5	181.5	197	363	97.5	112.5	423.5	199.5	194.5
3.125	288	69	122.5	224	29.5	58.5	323.5	83.5	113
Figure 1e	MAIT clone:BEAS-2B
5-A-RU prodrug titration (μM)	WT			Syt1 KO			Syt7 KO
1	850	765	741	724.5	714	677.5	710.5	682.5	687.5
0.5	744	692	621.5	675	572.5	503.5	708.5	578	501
0.25	651	559.5	458	516.5	449.5	363.5	433.5	441.5	305
0.125	388.5	430.5	288.5	293	263.5	188.5	248.5	233.5	180.5
0.0625	160	230.5	158.5	125.5	97.5	80.5	87	99	97.5
