# Supplementary material for: Synaptotagmin 1 and Synaptotagmin 7 promote MR1-mediated presentation of Mycobacterium tuberculosis antigens
Source: eLife. 2026 Apr 14;14:RP108318. doi: 10.7554/eLife.108318 (PMC13078786; doi:10.7554/eLife.108318)
Supplement: Figure 2—source data 1. [file elife-108318-fig2-data1.xlsx]

## Sheet: Sheet1
Figure 2c	WT	Syt1 KO	Syt7 KO			WT	Syt1 KO	Syt7 KO
% uptake of live BEAS-2B cells	71.6	69.3	67.3		CFU/100 cells	55.3	38.3	40.3
	68	60	54.2			42.6	40	44.6
	89.5	88.7	74.2			40	26.3	34.6
Figure 2d	MR1		GAPDH
WT	29.843	30.8012	20.2895	21.0582
Syt1 KO	30.7817	30.6064	20.5992	20.605
Syt7 KO	30.3177	30.4996	20.6572	20.7322
