# Supplementary material for: Synaptotagmin 1 and Synaptotagmin 7 promote MR1-mediated presentation of Mycobacterium tuberculosis antigens
Source: eLife. 2026 Apr 14;14:RP108318. doi: 10.7554/eLife.108318 (PMC13078786; doi:10.7554/eLife.108318)
Supplement: Figure 3—source data 1. [file elife-108318-fig3-data1.xlsx]

## Sheet: Sheet1
Figure 3a	Syt1 KO				Syt7 KO
	Indel	Percent distribution			Indel	Percent distribution
	-1	48			-16	100
	-20	47
Figure 3b	MAIT clone:BEAS-2B
Mtb infected cells (x1,000)	WT			Syt1 KO
20	433	401	449.5	323	334.5	317
10	271	264	282	168	173	177.5
5	170	181.5	193	110	107	112.5
2.5	85.5	76.5	106.5	47	64	49
1.25	50	37.5	62.5	22	36	21.5
	MAIT clone:BEAS-2B
Mtb infected cells (x1,000)	WT			Syt7 KO
20	299.5	277.5	318	223.5	220.5	197
10	201.5	140.5	159	137.5	107.5	100.5
5	119.5	72.5	78.5	66.5	59	42.5
2.5	62.5	30.5	38.5	33.5	30.5	17.5
1.25	30.5	17	19.5	19	11	6.5
Figure 3c	MAIT clone:BEAS-2B
Msmeg supernatant titration (μL)	WT			Syt1 KO			Syt7 KO
5	746	796.5	812	700	840.5	851.5	695	813	747.5
2.5	681	776	742.5	739	816	837	633	798.5	759
1.25	631.5	717.5	674.5	639.5	788.5	771.5	637.5	733.5	644
0.625	549.5	623.5	608	604	689.5	636.5	553.5	660	603.5
0.312	423.5	510.5	451	461	567.5	577	400	575	483.5
0.156	166	379.5	312	224.5	449	418	204.5	459	308.5
