# Supplementary material for: Synaptotagmin 1 and Synaptotagmin 7 promote MR1-mediated presentation of Mycobacterium tuberculosis antigens
Source: eLife. 2026 Apr 14;14:RP108318. doi: 10.7554/eLife.108318 (PMC13078786; doi:10.7554/eLife.108318)
Supplement: Figure 4—figure supplement 1—source data 1. [file elife-108318-fig4-figsupp1-data1.xlsx]

## Sheet: Sheet1
Figure 4-figure supplement 1
s1a	Esyt2
	Mis	KD
	1	0.03913
	1	0.0398048
	1	0.0375292
s1b
Surface MR1	Missense			Eyst2 KD
NaOH	4750	4432	5564	3101	2434	3117
Ac-6-FP	37888	34062	35829	19328	14230	16551
Surface HLA-Ia	Missense			Eyst2 KD
NaOH	12986	17262	16192	17732	22016	19744
Ac-6-FP	12670	17423	15356	18007	21947	19885
