# Supplementary material for: Synaptotagmin 1 and Synaptotagmin 7 promote MR1-mediated presentation of Mycobacterium tuberculosis antigens
Source: eLife. 2026 Apr 14;14:RP108318. doi: 10.7554/eLife.108318 (PMC13078786; doi:10.7554/eLife.108318)
Supplement: Figure 4—source data 1. [file elife-108318-fig4-data1.xlsx]

## Sheet: Sheet1
Figure 4a	CT values
	SYT11	ESYT1	ESYT2	GAPDH
	29.9855	22.2639	23.1525	17.3919
	29.7636	21.8034	22.8085	16.8935
	29.1765	23.9657	25.4146	18.7716
				18.1458
				17.3405
				17.9088
Figure 4b	SYT11			Esyt1			Esyt2
	Mis	KD		Mis	KD		Mis	KD
	1	0.110683		1	0.0624151		1	0.0904673
	1	0.0923016		1	0.0476462		1	0.0921584
	1	0.16006		1	0.014252		1	0.0318154
Figure 4c	MAIT clone:BEAS-2B											HLA-B45-restricted T clone:BEAS-2B
Mtb infected cells (x1,000)	Missense			Syt11 KD							Mtb infected cells (x1,000)	Missense			Syt11 KD
20	401.5	320	601	531.5	390.5	609.5					20	776.5	756	869	804.5	812	887.5
10	262	187.5	474	386	295.5	504					10	653	571.5	812	690.5	626.5	742.5
5	171.5	128	343.5	279	184	339					5	474.5	482.5	652	512.5	435	621
2.5	116.5	67	243.5	118.5	90.5	219.5					2.5	307	274	514.5	364.5	253	462.5
1.25	42	34	115.5	62.5	46.5	119.5					1.25	205.5	176.5	362.5	221.5	186.5	331.5
Msmeg sup titration (uL)	MAIT clone:BEAS-2B											HLA-B45-restricted T clone:BEAS-2B
20	529.5	421.5	435	677	706.5	611.5					CFP10 pep titration (ng/mL)	Missense			Syt11 KD
10	324.5	343	321.5	555.5	607.5	525.5					50	614.5	612.5	772	677.5	727.5	771.5
5	244.5	211.5	266	388.5	545.5	417.5					25	586.5	582	744	617.5	626.5	728.5
2.5	135.5	151	99.5	277.5	298.5	229.5					12.5	549	501	682	546.5	576	721
1.25	59.5	56.5	59.5	164.5	173.5	133					6.25	420.5	399	577.5	412	596	670
											3.125	238.5	278	454	372.5		542.5
Figure 4d & e	MAIT clone:BEAS-2B											HLA-B45-restricted T clone:BEAS-2B
Mtb infected cells (x1,000)	Missense			Esyt1 KD			Esyt2 KD				Mtb infected cells (x1,000)	Missense			Esyt1 KD			Esyt2 KD
20	628.5	620	530	605	571.5	559.5	438.5	363.5	297		20	824	782	734.5	790	746.5	732.5	782	745.5	725.5
10	491	417.5	400	473.5	414.5	403.5	338.5	242.5	190.5		10	742	697	658.5	700.5	655.5	635	648.5	600.5	586.5
5	364	306	271	332.5	240	258.5	181.5	147.5	139		5	559.5	557.5	478.5	580	517	517.5	497	425	455.5
2.5	232	192.5	189.5	179.5	131	151.5	101.5	75	70		2.5	447	410.5	334.5	465.5	360	380.5	371	304.5	312.5
1.25	141	98	105	108.5	77.5	88	67.5	41	38		1.25	286	228	213	326	236.5	282	224.5	188.5	191.5
Figure 4d & e	MAIT clone:BEAS-2B											HLA-B45-restricted T clone:BEAS-2B
Msmeg sup titration (uL)	Missense			Esyt1 KD			Esyt2 KD				CFP10 pep titration (ng/mL)	Missense			Esyt1 KD			Esyt2 KD
20	447	600.5	478	501.5	643.5	421.5	252	411	251		50	614	552	654	664.5	616.5	676.5	573	602	558.5
10	295.5	489	303	316.5	493.5	276.5	146	328	145		25	578	540	631.5	637	612.5	627.5	535	486.5	559
5	225	310.5	188.5	220	362	134	107.5	159	75.5		12.5	495.5	431.5	567	574.5	512.5	590	480	459	473
2.5	105.5	190	83	137.5	243	76	65.5	98.5	33		6.25	419.5	294.5	436.5	526.5	421.5	512	371.5	319.5	388.5
1.25	85	114	37	53	122.5	32.5	25.5	90	16.5		3.125	261.5	193	306	408.5	337.5	425.5	263	206.5	254
