# Supplementary material for: Synaptotagmin 1 and Synaptotagmin 7 promote MR1-mediated presentation of Mycobacterium tuberculosis antigens
Source: eLife. 2026 Apr 14;14:RP108318. doi: 10.7554/eLife.108318 (PMC13078786; doi:10.7554/eLife.108318)
Supplement: Figure 5—source data 1. [file elife-108318-fig5-data1.xlsx]

## Sheet: Sheet1
Figure 5b
% Co-localization with Syt	Syt1														Syt7
Rab5a	0	4	6.93069	6.25	19.3548	9.18367	15.2174	15.8879	9.34579	5.71429	6.2069			Rab5a	4.08163	3.84615	17.3913	6.38298	16.6667	9.23077	3.75	4.81928	4.61538	15.7895	18.9189
Rab7a	64	66.4122	60.396	55.6818	43.7037	61.7021	61.039	54.386	62.1495	73.1343	72.7273	51.9608		Rab7a	65.3061	68.4211	50	38.5714	61.4173	60.5442	64.1892	57.1429	58.0645	70.3297	66.6667	60.5263
Lamp1	26.7857	35.2941	58.4158	61.5385	58.9474	45.283	48.3871	42.1053	70.4225	61.2245	35.2	56.0694		Lamp1	63.2653	64.4068	52.1739	51.4563	49.1525	45	60.5263	48.0392	51.9481	44.6429	70.5128	71.0526
Figure 5d	% Co-localization with MR1
	Syt1	Syt7
	66.6667	38.3838
	77.0492	87.1795
	54.2056	59.2593
	38.0952	42.1053
	51.6484	67.9245
	28.3333	49.4118
	57.1429	46.6667
	37.8378	42.3077
	77.1429	53.5484
	60.5634	53.1915
	59.3023	72.7273
	48.9796	41.6667
	47.9798	53.3333
	48.3871	60
	54.9451	69.8925
	60	71.6418
	68.2927	54.3478
