# Supplementary material for: Synaptotagmin 1 and Synaptotagmin 7 promote MR1-mediated presentation of Mycobacterium tuberculosis antigens
Source: eLife. 2026 Apr 14;14:RP108318. doi: 10.7554/eLife.108318 (PMC13078786; doi:10.7554/eLife.108318)
Supplement: Figure 6—source data 1. [file elife-108318-fig6-data1.xlsx]

## Sheet: Sheet1
Figure 6a	Syt1 KO				Syt7 KO
	Indel	Percent distribution			Indel	Percent distribution
	-127	83			1	19
	-88	8			-69	16
	-88	5			-69	13
	-88	3			-70	11
	-186	1			-111	7
					10	7
					-128	4
					-62	3
					-113	3
					-22	3
					-6	3
					-69	2
					-61	2
					-15	2
					-64	1
					-129	1
					14	1
					-36	1
					-34	1
Figure 6b	MAIT clone:BEAS-2B										HLA-B45-restricted T clone:BEAS-2B
Mtb infected cells (x1,000)	WT			Syt1 KO						Mtb infected cells (x1,000)	WT			Syt1 KO
10	376.5	263	376	293	140	171.5				10	687.5	555	672.5	599.5	486.5	486.5
5	255	158	226.5	173.5	99	104.5				5	521	400.5	493.5	471.5	321	321
2.5	157.5	91.5	139	101.5	49	53				2.5	387	283	321.5	318	192	192
1.25	98.5	55	74	57.5	23	33				1.25	230.5	213	217	201	144.5	144
0.625	43	28.5	46.5	33.5	13.5	15.5				0.625	156.5	117.5	133.5	133.5	73.5	73
	MAIT clone:BEAS-2B										HLA-B45-restricted T clone:BEAS-2B
Mtb infected cells (x1,000)	WT				Syt7 KO					Mtb infected cells (x1,000)	WT			Syt7 KO
10	295.5	282.5	140	376.5	175.5	142.5	92	155		10	583	577.5	687.5	476	490	454.5
5	181	158.5	94	255	108	76	51	67.5		5	399.5	442	521	357.5	346	334.5
2.5	85	76	51.5	157.5	45	38.5	29.5	47		2.5	252	297.5	387	253	208	230.5
1.25	46.5	48.5	17	98.5	25	19	17.5	24		1.25	162	198.5	230.5	137	137	137
0.625	19.5	25.5	15.5	43	12.5	12.5	3	30		0.625	80.5	95	156.5	68.5	61.5	84
Figure 6d
Surface MR1	WT			Syt1 KO			Syt7 KO
NaOH	2383	2918	2766	2961	3153	3303	2605	3000	3232
Ac-6-FP	21691	25630	22169	22511	19536	25155	22776	18352	24581
Surface HLA-Ia	WT			Syt1 KO			Syt7 KO
NaOH	11989	4614	4895	12200	4578	3982	15617	6220	5693
Ac-6-FP	12718	5780	5259	11415	4499	3675	13429	5364	4452
Figure 6f	WT
Small vesicle	0.71	0.63	0.39	0.41	0.96	0.88	0.64	0.7	0.45	0.73	0.67	0.78	0.59	0.68	0.93
Large vesicle	4.93	3.88	1.63	1.23	4.54	4.15	2.62	6.24	1.67	5	3.55	3.85	3.82	3.38	3.83
	Syt1 KO
Small vesicle	0.56	0.83	0.54	0.71	0.85	0.93	1.18	0.93	0.91	0.84	0.62	0.68	0.69	0.89	0.87
Large vesicle	6.46	5.73	3.44	3.65	5.62	9.21	10.28	6.73	5.67	6.97	2.56	3.92	6.76	3.44	6.73
	Syt7 KO
Small vesicle	0.58	0.55	0.4	0.52	0.51	0.65	0.95	0.79	0.66	0.69	0.9	0.91	0.59	0.69	0.77
Large vesicle	2.65	3.94	2.92	3.11	3.92	4.33	5.45	8.87	4.13	2.81	6.4	6.53	3.08	5.93	9.13
Figure 6h	WT
Rab5a	0.0819672	0.057971	0.178947	0.0638298	0	0.0285714	0.203704	0.0526316	0.0394737	0	0.0769231	0.244681	0.0352941	0.015873	0.0865385	0.150943
Lamp1	0.719512	0.625	0.708955	0.868687	0.756757	0.38806	0.0379747	0.196078	0.666667	0.603604	0.787879	0.711111	0.592593	0.607595	0.777778	0.85567
	Syt1 KO
Rab5a	0.03	0.0740741	0.0645161	0.0377359	0.0357143	0.0990099	0.0338983	0.0392157	0.112245	0.0568182	0.1	0.0344828	0	0.037037	0.0175439	0.0227273
Lamp1	0.290909	0.42069	0.672727	0.57	0.224138	0.809091	0.623377	0.4375	0.822785	0.518072	0.779661	0.784615	0.803279	0.721739	0.68254	0.754717
	Syt7 KO
Rab5a	0.133333	0.0491803	0.0535714	0.0476191	0.0543478	0.0185185	0.03125	0.0673077	0.0465116	0.04	0.0693069	0	0.142857	0.0335196	0.0581395	0.097561
Lamp1	0.556701	0.777778	0.854167	0.666667	0.666667	0.515152	0.745614	0.435644	0.6875	0.690265	0.415094	0.381818	0.542254	0.232143	0.284483	0.47619
