# Supplementary material for: Synaptotagmin 1 and Synaptotagmin 7 promote MR1-mediated presentation of Mycobacterium tuberculosis antigens
Source: eLife. 2026 Apr 14;14:RP108318. doi: 10.7554/eLife.108318 (PMC13078786; doi:10.7554/eLife.108318)
Supplement: Figure 7—source data 1. [file elife-108318-fig7-data1.xlsx]

## Sheet: Sheet1
Figure 7b	Number of MR1 vesicles within 1μm of Mtb					Figure 7c	# of MR1 vesicles				Speed of MR1 vesicles					Figure 7d	Overlapped area ratio to Mtb surfaces					Figure 7f	Percent frequency					Figure 7g	GeoMFI of MR1 expression
	WT	Syt1 KO	Syt7 KO				WT	Syt1 KO	Syt7 KO		WT	Syt1 KO	Syt7 KO				WT	S1KO	S7KO				WT						WT	Syt1 KO	Syt7 KO
	0	1	5				36	80	93		0.103	0.122	0.103				0	0.0439	0.162			Fraction	Total LAMP1+	Total MR1+	AuxMtb+LAMP1+				210	255	243
	3	3	3				39	61	23		0.0973	0.112	0.0707				0.0159	0.153	0.198			36	11.9	11	0.65				217	270	273
	0	1	2				44	49	35		0.142	0.0933	0.111				0	0.0267	0.009			37	11	10.8	0.4				225	220	302
	2	2	3				20	87	41		0.235	0.19	0.184				0.47	0.208	0.571			38	9.9	9.13	0.38
	2	2	2				43	53	51		0.0922	0.0934	0.0746				0	0.718	0			39	9.55	9.13	0.25
	0	2	2				25	54	58		0.0813	0.172	0.0741				0	0.0949	0.225			40	10.9	10.5	0.42
	2	1	2				25	63	36		0.112	0.0788	0.143				0.0402	0.164	0			41	12	10.1	0.69
	1	3	3				41	55	23		0.102	0.0944	0.0726				0.0298	0.202	0.195			42	19.6	12.7	2.75
	0	1	5				97	37	75		0.105	0.194	0.155				0	0	0.29			43	13.9	12.1	0.96
	4	1	2				74	26	63		0.3	0.116	0.18				0.0815	0	0			44	15	11.3	1.48
	2	4	2				28	58	63		0.111	0.0714	0.0951				0.323	0.793	0.823			45	24	14.8	4.55
	2	2	2				50	45	43		0.11	0.0984	0.0771				0	0.0322	0.0497			46	52	17.6	19
	1	2	3				51	71	78		0.0624	0.0798	0.116				0	0.0533	0.107			47	48.5	8.19	21.5
	1	3	4				20	36	81		0.054	0.0603	0.0863				0.00619	0.492	0.232			48	25.5	7.09	7.11
		3	3					30	46			0.0587	0.109					0.229	0			49	15.3	7.59	1.95
			1						65				0.105						0.12			50	12.4	6.04	0.44
	1	1	3				65	90	57								0	0	0.219				Syt1 KO
	1	4	3				32	102	114								0.0927	0.0793	0.205			Fraction	Total LAMP1+	Total MR1+	AuxMtb+LAMP1+
	0	3	2				49	113	72								0	0	0			36	14.4	11.9	0.7
	0	3	3				50	81	131								0	0.118	0.082			37	11.2	11.4	0.41
	0	1	3				57	40	92								0	0	0			38	11.2	12.1	0.4
	1	3	4				70	71	45								0.0185	0.0621	0			39	10.5	10.9	0.28
	2	1	1				125	113	57								0.0172	0.0441	0.0945			40	14.3	13.6	0.93
	1	3	5				76	64	54								0	0.127	0.924			41	19.1	14.3	2.08
	2	3	2				49	77	88								0.116	0.0161	0.0239			42	14.9	13.2	1.19
	1	2	2				115	47	91								0	0.17	0			43	18.6	14.7	1.86
	2	4	1				55	98	74								0	0.0403	0.0992			44	22.8	16.4	2.69
	0	2	3				67	69	34								0	0.0989	0.302			45	46.4	16	16.7
	0	3	0				113	71	72								0	0.168	0			46	28.7	15.5	6.75
																						47	30.7	16.1	6.65
	0	3	4				63	61	82								0	0.199	0.349			48	24.8	11.1	5.33
	0	4	4				94	96	81								0	0.0771	0.2			49	20.7	7.31	1.72
	1	0	2				51	83	77								0.0234	0	0			50	20.1	5.4	1.08
	1	3	4				94	84	87								0.367	0.0957	0.0319
	1	2	2				73	54	50								0	0	0.0976				Syt7 KO
	4	2	2				109	37	93								0	0.342	0.0242			Fraction	Total LAMP1+	Total MR1+	AuxMtb+LAMP1+
	1	4	1				63	66	91								0	0.398	0			36	12.5	9.5	0.61
	0	1	2				111	77	49								0	0	0.0526			37	11.5	9.17	0.53
	0	3	2				73	120	101								0	0.302	0.0869			38	11.2	9.43	0.47
	2	4	3				99	79	67								0	0.161	0.143			39	11.9	9.54	0.44
	2	3	1				49	48	68								0.0955	0.379	0			40	12.9	8.31	0.73
	1	1	3				58	73	57								0	0.326	0.313			41	14.2	8.75	1.09
	0	4	1				67	57	32								0	0.0101	0			42	15.4	9.81	1.48
	1	1	0				79	144	62								0	0.0825	0			43	19.2	10.4	3
																						44	25.9	11.8	5.79
	1	2	2				48	95	53								0.0387	0.4	0.0919			45	57.9	12.5	23.1
	1	2	1				60	81	119								0	0.00107	0			46	44.5	11.4	20
	1	2	3				94	88	58								0	0.106	0.212			47	31.6	10.2	9.81
	1	1	4				56	76	48								0	0	0.0826			48	24.2	7.82	6.16
	3	2	2				88	98	104								0.0833	0.00287	0.0262			49	12.9	5.56	0.74
	1	2	2				83	58	58								0	0.0175	0.0122			50	12.2	5.84	0.57
	1	2	1				56	43	45								0	0.131	0
	3	4	2				70	46	116								0.0369	0.276	0.133
	0	4	2				47	70	55								0	0.299	0.0561
	1	3	2				38	59	48								0	0	0.0686
