# Supplementary material for: Synaptotagmin 1 and Synaptotagmin 7 promote MR1-mediated presentation of Mycobacterium tuberculosis antigens
Source: eLife. 2026 Apr 14;14:RP108318. doi: 10.7554/eLife.108318 (PMC13078786; doi:10.7554/eLife.108318)
Supplement: Supplementary file 1. [file elife-108318-supp1.xlsx]

## Sheet: Fig 5b
	Figure 5b: Percent co-localization of endosomal markers with Syt
	2024-04-08
		Syt1						Syt1								Syt1
	Image #	#1	#2	#3	#4		Image #	#1	#2	#3	#4	#5	#6		Image #	#1	#2	#3	#4	#5	#6	#7
	Syt1RFP vesicles	42	75	101	144		Syt1RFP vesicles	100	131	101	88	135	47		Syt1RFP vesicles	56	51	101	104	95	53	62
	Rab5aGFP vesicles	60	241	43	55		Rab7aGFP vesicles	111	151	99	74	76	51		Lamp1GFP vesicles	63	74	123	137	119	46	42
	Co-localize	0	3	7	9		Co-localize	64	87	61	49	59	29		Co-localize	15	18	59	64	56	24	30
		0	0.04	0.0693069	0.0625			0.64	0.664122	0.60396	0.556818	0.437037	0.617021			0.267857	0.352941	0.584158	0.615385	0.589474	0.45283	0.483871
	%	0	4	6.93069	6.25		%	64	66.4122	60.396	55.6818	43.7037	61.7021		%	26.7857	35.2941	58.4158	61.5385	58.9474	45.283	48.3871
		Syt7						Syt7								Syt7
	Image #	#1	#2	#3	#4		Image #	#1	#2	#3	#4	#5	#6		Image #	#1	#2	#3	#4	#5	#6
	Syt7RFP vesicles	49	26	69	47		Syt7RFP vesicles	49	38	80	70	127	147		Syt7RFP vesicles	98	59	115	103	59	40
	Rab5aGFP vesicles	41	34	58	55		Rab7aGFP vesicles	61	50	51	44	185	109		Lamp1GFP vesicles	136	83	96	73	39	54
	Co-localize	2	1	12	3		Co-localize	32	26	40	27	78	89		Co-localize	62	38	60	53	29	18
		0.0408163	0.0384615	0.173913	0.0638298			0.653061	0.684211	0.5	0.385714	0.614173	0.605442			0.632653	0.644068	0.521739	0.514563	0.491525	0.45
	%	4.08163	3.84615	17.3913	6.38298		%	65.3061	68.4211	50	38.5714	61.4173	60.5442		%	63.2653	64.4068	52.1739	51.4563	49.1525	45
	2024-04-11
		Syt1									Syt1								Syt1
	Image #	#1	#2	#3	#4	#5	#6	#7		Image #	#1	#2	#3	#4	#5	#6		Image #	#1	#2	#3	#4	#5
	Syt1RFP vesicles	93	98	92	107	107	140	145		Syt1RFP vesicles	77	114	214	134	66	102		Syt1RFP vesicles	57	71	49	125	173
	Rab5aGFP vesicles	78	68	87	186	83	69	157		Rab7aGFP vesicles	79	89	276	122	88	135		Lamp1GFP vesicles	104	60	34	169	129
	Co-localize	18	9	14	17	10	8	9		Co-localize	47	62	133	98	48	53		Co-localize	24	50	30	44	97
		0.193548	0.0918367	0.152174	0.158879	0.0934579	0.0571429	0.062069			0.61039	0.54386	0.621495	0.731343	0.727273	0.519608			0.421053	0.704225	0.612245	0.352	0.560694
		19.3548	9.18367	15.2174	15.8879	9.34579	5.71429	6.2069			61.039	54.386	62.1495	73.1343	72.7273	51.9608			42.1053	70.4225	61.2245	35.2	56.0694
		Syt7									Syt7								Syt7
	Image #	#1	#2	#3	#4	#5	#6	#7		Image #	#1	#2	#3	#4	#5	#6		Image #	#1	#2	#3	#4	#5	#6
	Syt7RFP vesicles	42	65	80	83	65	57	111		Syt7RFP vesicles	148	35	62	91	84	114		Syt7RFP vesicles	114	102	77	112	78	76
	Rab5aGFP vesicles	36	101	109	134	144	74	253		Rab7aGFP vesicles	193	34	49	152	74	79		Lamp1GFP vesicles	79	85	73	171	129	73
	Co-localize	7	6	3	4	3	9	21		Co-localize	95	20	36	64	56	69		Co-localize	69	49	40	50	55	54
		0.166667	0.0923077	0.0375	0.0481928	0.0461538	0.157895	0.189189			0.641892	0.571429	0.580645	0.703297	0.666667	0.605263			0.605263	0.480392	0.519481	0.446429	0.705128	0.710526
		16.6667	9.23077	3.75	4.81928	4.61538	15.7895	18.9189			64.1892	57.1429	58.0645	70.3297	66.6667	60.5263			60.5263	48.0392	51.9481	44.6429	70.5128	71.0526

## Sheet: Fig 5d
	Figure 6d: Percent co-localization of Syts with MR1
	2023-01-23
		Syt1						Syt7
	Image #	#1	#2				Image #	#1	#2	#3
	MR1-GFP vesicles	59	76				MR1 -GFP vesicles	53	66	46
	Syt1-RFP vesicles	69	61				Syt7-RFP vesicles	85	45	78
	Co-localize	46	47				Co-localize	42	21	33
	Co-localize/Syt1	0.666667	0.770492				Co-localize/Syt7	0.494118	0.466667	0.423077
	%	66.6667	77.0492				%	49.4118	46.6667	42.3077
	2023-02-01
		Syt1
	Image #	#1	#2	#3	#4	#5	#6	#7	#8	#9	#10	#11	#12	#13	#14	#15
	MR1-GFP vesicles	97	119	82	50	78	55	133	56	64	66	136	78	64	151	72
	Syt1-RFP vesicles	107	63	91	60	77	37	70	71	86	98	198	31	91	90	82
	Co-localize	58	24	47	17	44	14	54	43	51	48	95	15	50	54	56
	Co-localize/Syt1	0.542056	0.380952	0.516484	0.283333	0.571429	0.378378	0.771429	0.605634	0.593023	0.489796	0.479798	0.483871	0.549451	0.6	0.682927
	%	54.2056	38.0952	51.6484	28.3333	57.1429	37.8378	77.1429	60.5634	59.3023	48.9796	47.9798	48.3871	54.9451	60	68.2927
		Syt7
	Image #	#1	#2	#3	#4	#5	#6	#7	#8	#9
	MR1 -GFP vesicles	146	63	77	61	104	80	113	110	74
	Syt7-RFP vesicles	155	94	66	120	150	70	93	67	92
	Co-localize	83	50	48	50	80	42	65	48	50
	Co-localize/Syt7	0.535484	0.531915	0.727273	0.416667	0.533333	0.6	0.698925	0.716418	0.543478
	%	53.5484	53.1915	72.7273	41.6667	53.3333	60	69.8925	71.6418	54.3478
	2022-08-04						2022-08-09
		Syt7						Syt7
	Image #	#1	#2				Image #	#1	#2	#3
	MR1 - GFP vesicles	53	92				MR1 - GFP vesicles	80	125	93
	Syt7-RFP vesicles	99	39				Syt7-RFP vesicles	81	171	53
	Co-localize	38	34				Co-localize	48	72	36
	co-localize/Syt7	0.383838	0.871795				co-localize/Syt7	0.592593	0.421053	0.679245
	%	38.3838	87.1795				%	59.2593	42.1053	67.9245

## Sheet: Fig 6f
	Figure 6f: Area of MR1 vesicles
	2024-02-16
		WT
	Image #	#1	#2	#3
	Class A small vesicles	0.59	0.68	0.93
	Class B large vesicles	3.82	3.38	3.83
		Syt7 KO
	Image #	#1	#2	#3
	Class A small vesicles	0.59	0.69	0.77
	Class B large vesicles	3.08	5.93	9.13
	2024-03-15
		WT
	Image #	#1	#2	#3	#4
	Class A small vesicles	0.78	0.73	0.67	0.45
	Class B large vesicles	3.85	5	3.55	1.67
		Syt1 KO
	Image #	#1	#2	#3	#4	#5
	Class A small vesicles	0.62	0.68	0.69	0.89	0.87
	Class B large vesicles	2.56	3.92	6.76	3.44	6.73
		Syt7 KO
	Image #	#1	#2	#3	#4
	Class A small vesicles	0.91	0.66	0.69	0.9
	Class B large vesicles	6.53	4.13	2.81	6.4
	2024-03-20
		WT
	Image #	#1	#2	#3	#4	#5	#6	#7	#8
	Class A small vesicles	0.708957	0.634436	0.389611	0.405305	0.959691	0.881191	0.639241	0.700533
	Class B large vesicles	4.93128	3.87546	1.63335	1.23102	4.54399	4.15085	2.61566	6.23694
		Syt1 KO
	Image #	#1	#2	#3	#4	#5	#6	#7	#8	#9	#10
	Class A small vesicles	0.561153	0.825732	0.539613	0.710582	0.853301	0.927052	1.18056	0.92906	0.909607	0.838496
	Class B large vesicles	6.46097	5.7259	3.44048	3.6487	5.62084	9.21488	10.2843	6.72804	5.66765	6.97367
		Syt7 KO
	Image #	#1	#2	#3	#4	#5	#6	#7	#8
	Class A small vesicles	0.58129	0.551431	0.395682	0.52284	0.508119	0.654424	0.950481	0.793536
	Class B large vesicles	2.64829	3.93727	2.91539	3.11479	3.91531	4.32536	5.4481	8.86996

## Sheet: Fig 6h
	Figure 6h: % Co-loclization of endosomal markers with MR1
	2024-02-16
		WT
	Image #	#1	#2	#3	#4	#5
	MR1	82	64	134	99	74
	coloc with lamp1	59	40	95	86	56
		0.719512	0.625	0.708955	0.868687	0.756757
		Syt7 KO
	Image #	#1	#2	#3	#4
	MR1	97	99	96	207
	coloc with lamp1	54	77	82	138
		0.556701	0.777778	0.854167	0.666667
	2024-06-04
		WT										WT
	Image #	#1	#2	#3							Image #	#1	#2	#3	#4	#5	#6	#7
	MR1	67	79	51							MR1	80	78	94	85	63	104	53
	coloc with lamp1	26	3	10							coloc with rab5a	0	6	23	3	1	9	8
		0.38806	0.0379747	0.196078								0	0.0769231	0.244681	0.0352941	0.015873	0.0865385	0.150943
		Syt1 KO										Syt1 KO
	Image #	#1	#2	#3	#4	#5					Image #	#1	#2	#3
	MR1	55	145	55	58	100					MR1	54	57	88
	coloc with lamp1	16	61	37	13	57					coloc with rab5a	2	1	2
		0.290909	0.42069	0.672727	0.224138	0.57						0.037037	0.0175439	0.0227273
		Syt7 KO										Syt7 KO
	Image #	#1	#2	#3	#4	#5	#6	#7			Image #	#1	#2	#3	#4	#5
	MR1	84	66	114	101	96	113	53			MR1	75	63	179	86	41
	coloc with lamp1	56	34	85	44	66	78	22			coloc with rab5a	0	9	6	5	4
		0.666667	0.515152	0.745614	0.435644	0.6875	0.690265	0.415094				0	0.142857	0.0335196	0.0581395	0.097561
	2024-06-07
		WT										WT
	Image #	#1	#2	#3	#4	#5	#6				Image #	#1	#2	#3	#4	#5	#6
	MR1	97	90	79	54	135	66				MR1	61	138	95	94	50	70
	coloc with lamp1	83	70	48	32	96	52				coloc with rab5a	5	8	17	6	0	2
		0.85567	0.777778	0.607595	0.592593	0.711111	0.787879					0.0819672	0.057971	0.178947	0.0638298	0	0.0285714
		Syt1 KO										Syt1 KO
	Image #	#1	#2	#3	#4	#5	#6	#7	#8		Image #	#1	#2	#3	#4	#5	#6	#7	#8
	MR1	79	83	59	65	53	122	115	63		MR1	101	100	54	59	93	106	102	56
	coloc with lamp1	65	43	46	51	40	98	83	43		coloc with rab5a	10	3	4	2	6	4	4	2
		0.822785	0.518072	0.779661	0.784615	0.754717	0.803279	0.721739	0.68254			0.0990099	0.03	0.0740741	0.0338983	0.0645161	0.0377358	0.0392157	0.0357143
		Syt7 KO										Syt7 KO
	Image #	#1	#2	#3	#4						Image #	#1	#2	#3	#4	#5	#6	#7
	MR1	55	142	56	116						MR1	92	54	64	60	61	56	63
	coloc with lamp1	21	77	13	33						coloc with rab5a	5	1	2	8	3	3	3
		0.381818	0.542254	0.232143	0.284483							0.0543478	0.0185185	0.03125	0.133333	0.0491803	0.0535714	0.047619
	2024-06-11
		WT										WT
	Image #	#1	#2								Image #	#1	#2	#3
	MR1	99	111								MR1	54	57	76
	coloc with lamp1	66	67								coloc with rab5a	11	3	3
		0.666667	0.603604									0.203704	0.0526316	0.0394737
		Syt1 KO										Syt1 KO
	Image #	#1	#2	#3							Image #	#1	#2	#3	#4	#5
	MR1	110	64	77							MR1	98	88	90	145	57
	coloc with lamp1	89	28	48							coloc with rab5a	11	5	9	5	0
		0.809091	0.4375	0.623377								0.112245	0.0568182	0.1	0.0344828	0
		Syt7KO										Syt7 KO
	Image #	#1									Image #	#1	#2	#3	#4
	MR1	63									MR1	104	86	75	101
	coloc with lamp1	30									coloc with rab5a	7	4	3	7
		0.47619										0.0673077	0.0465116	0.04	0.0693069

## Sheet: Fig 7b-d_exp1-5
	Figure 7b-d
	Experiment 1								Experiment 4
	20240604 - WT	#1							20240717 - WT	#1	#2	#3
	overlapped area ratio to surfaces - surfaces	0							overlapped area ratio to surfaces - surfaces	0.0815	0.323	0
	number of vesicles close to mtb	0							number of vesicles close to mtb	4	2	2
	total number of MR1 vesicles	36							total number of MR1 vesicles	74	28	50
	speed of Mr1 vesicles	0.103							speed of Mr1 vesicles	0.3	0.111	0.11
	20240604 - Syt1 KO	#1	#2	#3					20240717 - Syt1 KO	#1	#2
	overlapped area ratio to surfaces - surfaces	0.0439	0.153	0.0267					overlapped area ratio to surfaces - surfaces	0	0
	number of vesicles close to mtb	1	3	1					number of vesicles close to mtb	1	1
	total number of MR1 vesicles	80	61	49					total number of MR1 vesicles	37	26
	speed of Mr1 vesicles	0.122	0.112	0.0933					speed of Mr1 vesicles	0.194	0.116
									20240717 - Syt7 KO	#1	#2	#3	#4	#5	#6	#7	#8	#9	#10	#11
	Experiment 2								overlapped area ratio to surfaces - surfaces	0.162	0.198	0.009	0.571	0	0.225	0	0.195	0.823	0	0.267
	20240607 - WT	#1	#2	#3					number of vesicles close to mtb	5	3	2	3	2	2	2	3	5	2	2
	overlapped area ratio to surfaces - surfaces	0.0159	0	0.47					total number of MR1 vesicles	93	23	35	41	51	58	36	23	75	63	63
	number of vesicles close to mtb	3	0	2					speed of Mr1 vesicles	0.103	0.0707	0.111	0.184	0.0746	0.0741	0.143	0.0726	0.155	0.18	0.0951
	total number of MR1 vesicles	39	44	20
	speed of Mr1 vesicles	0.0973	0.142	0.235
									Experiment 5
	20240607 - Syt1 KO	#1	#2	#3					20240719 - WT	#1	#2
	overlapped area ratio to surfaces - surfaces	0.208	0.718	0.0949					overlapped area ratio to surfaces - surfaces	0	0.152
	number of vesicles close to mtb	2	2	2					number of vesicles close to mtb	1	1
	total number of MR1 vesicles	87	53	54					total number of MR1 vesicles	51	20
	speed of Mr1 vesicles	0.19	0.0934	0.172					speed of Mr1 vesicles	0.0624	0.054
									20240719 - Syt1 KO	#1	#2	#3	#4	#5
	Experiment 3								overlapped area ratio to surfaces - surfaces	0.793	0.0332	0.0533	0.492	0.229
	20240611 - WT	#1	#2	#3	#4	#5			number of vesicles close to mtb	4	2	2	3	3
	overlapped area ratio to surfaces - surfaces	0	0	0.0402	0.0298	0			total number of MR1 vesicles	58	45	71	36	30
	number of vesicles close to mtb	2	0	2	1	0			speed of Mr1 vesicles	0.0714	0.0984	0.0798	0.0603	0.0587
	total number of MR1 vesicles	43	25	25	41	97
	speed of Mr1 vesicles	0.0922	0.0813	0.112	0.102	0.105			20240719 - Syt7 KO	#1	#2	#3	#4	#5
									overlapped area ratio to surfaces - surfaces	0.0497	0.107	0.232	0	0.12
	20240611 - Syt1 KO	#1	#2						number of vesicles close to mtb	43	78	81	46	65
	overlapped area ratio to surfaces - surfaces	0.164	0.202						total number of MR1 vesicles	2	3	4	3	1
	number of vesicles close to mtb	1	3						speed of Mr1 vesicles	0.0771	0.116	0.0863	0.109	0.105
	total number of MR1 vesicles	63	55
	speed of Mr1 vesicles	0.0788	0.0944

## Sheet: Fig 7b-d_exp6
	Figure 7b-d
	Experiment 6
		20251014 - WT
	Image #	#1	#2	#3	#4	#5	#6	#7	#8	#9	#10	#11	#12	#13
	overlapped area ratio to surfaces - surfaces	0	0.0927	0	0	0	0.0185	0.0172	0	0.116	0	0	0	0
	number of vesicles close to mtb	1	1	0	0	0	1	2	1	2	1	2	0	0
	total number of MR1 vesicles	65	32	49	50	57	70	125	76	49	115	55	67	113
		20251014 - Syt1 KO
	Image #	#1	#2	#3	#4	#5	#6	#7	#8	#9	#10	#11	#12	#13
	overlapped area ratio to surfaces - surfaces	0	0.0793	0	0.118	0	0.0621	0.0441	0.127	0.0161	0.17	0.0403	0.0989	0.168
	number of vesicles close to mtb	1	4	3	3	1	3	1	3	3	2	4	2	3
	total number of MR1 vesicles	90	102	113	81	40	71	113	64	77	47	98	69	71
		20251014 - Syt7 KO
	Image #	#1	#2	#3	#4	#5	#6	#7	#8	#9	#10	#11	#12	#13
	overlapped area ratio to surfaces - surfaces	0.219	0.205	0	0.082	0	0	0.0945	0	0.924	0.0239	0.302	0.0992	0
	number of vesicles close to mtb	3	3	2	3	3	4	1	0	5	2	3	1	2
	total number of MR1 vesicles	57	114	72	131	92	45	57	72	54	88	34	74	91

## Sheet: Fig 7b-d_exp7
	Figure 7b-d
	Experiment 7
		20251016 - WT
	Image #	#1	#2	#3	#4	#5	#6	#7	#8	#9	#10	#11	#12	#13	#14
	overlapped area ratio to surfaces - surfaces	0	0	0.0234	0.367	0	0	0	0	0	0	0.0955	0	0	0
	number of vesicles close to mtb	0	0	1	1	1	4	1	0	0	2	2	1	0	1
	total number of MR1 vesicles	63	94	51	94	73	109	63	111	73	99	49	58	67	79
		20251016 - Syt1 KO
	Image #	#1	#2	#3	#4	#5	#6	#7	#8	#9	#10	#11	#12	#13	#14
	overlapped area ratio to surfaces - surfaces	0.199	0.0771	0	0.0957	0	0.342	0.398	0	0.302	0.161	0.379	0.326	0.0101	0.0825
	number of vesicles close to mtb	3	4	0	3	2	2	4	1	3	4	3	1	4	1
	total number of MR1 vesicles	61	96	83	84	54	37	66	77	120	79	48	73	57	144
		20251016 - Syt7 KO
	Image #	#1	#2	#3	#4	#5	#6	#7	#8	#9	#10	#11	#12	#13	#14
	overlapped area ratio to surfaces - surfaces	0.349	0.2	0	0.0319	0.0976	0.0242	0	0.0526	0.0869	0	0.143	0	0.313	0
	number of vesicles close to mtb	4	4	2	4	2	2	1	2	2	0	3	1	3	1
	total number of MR1 vesicles	82	81	77	87	50	93	91	49	101	62	67	68	57	32

## Sheet: Fig 7b-d_exp8
	Figure 7b-d
	Experiment 8
		20251021 - WT
	Image #	#1	#2	#3	#4	#5	#6	#7	#8	#9	#10
	overlapped area ratio to surfaces - surfaces	0.0387	0	0	0	0.0833	0	0	0.0369	0	0
	number of vesicles close to mtb	1	1	1	1	3	1	1	3	0	1
	total number of MR1 vesicles	48	60	94	56	88	83	56	70	47	38
		20251021 - Syt1 KO
	Image #	#1	#2	#3	#4	#5	#6	#7	#8	#9	#10
	overlapped area ratio to surfaces - surfaces	0.4	0.00107	0.106	0	0.00287	0.0175	0.131	0.276	0.299	0
	number of vesicles close to mtb	2	2	2	1	2	2	2	4	4	3
	total number of MR1 vesicles	95	81	88	76	98	58	43	46	70	59
		20251021 - Syt7 KO
	Image #	#1	#2	#3	#4	#5	#6	#7	#8	#9	#10
	overlapped area ratio to surfaces - surfaces	0.0919	0	0.212	0.0826	0.0262	0.0122	0	0.133	0.0561	0.0686
	number of vesicles close to mtb	2	1	3	4	2	2	1	2	2	2
	total number of MR1 vesicles	53	119	58	48	104	58	45	116	55	48

## Sheet: Fig 7b-d_compiled
	Figure 7b-d
	Number of MR1 vesicles within 1um of Mtb					Overlapped area ratio to Mtbsurfaces					# of MR1 vesicles					Speed of MR1 vesicles
	WT	S1KO	S7KO			WT	S1KO	S7KO			WT	Syt1 KO	Syt7 KO			WT	Syt1 KO	Syt7 KO
Exp 1-5	0	1	5			0	0.0439	0.162			36	80	93			0.103	0.122	0.103
	3	3	3			0.0159	0.153	0.198			39	61	23			0.0973	0.112	0.0707
	0	1	2			0	0.0267	0.009			44	49	35			0.142	0.0933	0.111
	2	2	3			0.47	0.208	0.571			20	87	41			0.235	0.19	0.184
	2	2	2			0	0.718	0			43	53	51			0.0922	0.0934	0.0746
	0	2	2			0	0.0949	0.225			25	54	58			0.0813	0.172	0.0741
	2	1	2			0.0402	0.164	0			25	63	36			0.112	0.0788	0.143
	1	3	3			0.0298	0.202	0.195			41	55	23			0.102	0.0944	0.0726
	0	1	5			0	0	0.29			97	37	75			0.105	0.194	0.155
	4	1	2			0.0815	0	0			74	26	63			0.3	0.116	0.18
	2	4	2			0.323	0.793	0.823			28	58	63			0.111	0.0714	0.0951
	2	2	2			0	0.0322	0.0497			50	45	43			0.11	0.0984	0.0771
	1	2	3			0	0.0533	0.107			51	71	78			0.0624	0.0798	0.116
	1	3	4			0.00619	0.492	0.232			20	36	81			0.054	0.0603	0.0863
		3	3				0.229	0				30	46				0.0587	0.109
			1					0.12					65					0.105
Exp 6	1	1	3			0	0	0.219			65	90	57		mean	0.1219	0.109	0.1098
	1	4	3			0.0927	0.0793	0.205			32	102	114		p-value		0.7071	0.7297
	0	3	2			0	0	0			49	113	72		n	14	15	16
	0	3	3			0	0.118	0.082			50	81	131
	0	1	3			0	0	0			57	40	92
	1	3	4			0.0185	0.0621	0			70	71	45
	2	1	1			0.0172	0.0441	0.0945			125	113	57
	1	3	5			0	0.127	0.924			76	64	54
	2	3	2			0.116	0.0161	0.0239			49	77	88
	1	2	2			0	0.17	0			115	47	91
	2	4	1			0	0.0403	0.0992			55	98	74
	0	2	3			0	0.0989	0.302			67	69	34
	0	3	0			0	0.168	0			113	71	72
Exp 7	0	3	4			0	0.199	0.349			63	61	82
	0	4	4			0	0.0771	0.2			94	96	81
	1	0	2			0.0234	0	0			51	83	77
	1	3	4			0.367	0.0957	0.0319			94	84	87
	1	2	2			0	0	0.0976			73	54	50
	4	2	2			0	0.342	0.0242			109	37	93
	1	4	1			0	0.398	0			63	66	91
	0	1	2			0	0	0.0526			111	77	49
	0	3	2			0	0.302	0.0869			73	120	101
	2	4	3			0	0.161	0.143			99	79	67
	2	3	1			0.0955	0.379	0			49	48	68
	1	1	3			0	0.326	0.313			58	73	57
	0	4	1			0	0.0101	0			67	57	32
	1	1	0			0	0.0825	0			79	144	62
Exp 8	1	2	2			0.0387	0.4	0.0919			48	95	53
	1	2	1			0	0.00107	0			60	81	119
	1	2	3			0	0.106	0.212			94	88	58
	1	1	4			0	0	0.0826			56	76	48
	3	2	2			0.0833	0.00287	0.0262			88	98	104
	1	2	2			0	0.0175	0.0122			83	58	58
	1	2	1			0	0.131	0			56	43	45
	3	4	2			0.0369	0.276	0.133			70	46	116
	0	4	2			0	0.299	0.0561			47	70	55
	1	3	2			0	0	0.0686			38	59	48
mean	1.137	2.365	2.415		mean	0.03639	0.1488	0.1304		mean	63.51	69.88	67.09
p-value		<0.0001	<0.0001		p-value		0.001	0.0062		p-value		0.3357	0.6897
n	51	52	53		ratio		4.08904	3.5834		n	51	52	53
					n	51	52	53
