# Supplementary material for: Synaptotagmin 1 and Synaptotagmin 7 promote MR1-mediated presentation of Mycobacterium tuberculosis antigens
Source: eLife. 2026 Apr 14;14:RP108318. doi: 10.7554/eLife.108318 (PMC13078786; doi:10.7554/eLife.108318)
Supplement: Supplementary file 2. [file elife-108318-supp2.xlsx]

## Sheet: Sheet1
Plasmid sequences
Syt1-RFP	GAATTCATGGTGAGCGAGAGTCACCATGAGGCCCTGGCAGCCCCGCCTGTCACCACTGTCGCGACTGTTCTGCCAAGCAACGCCACAGAGCCAGCCAGTCCTGGAGAAGGAAAGGAAGATGCATTTTCTAAGCTGAAGGAGAAGTTTATGAATGAGTTGCATAAAATTCCATTGCCACCGTGGGCCTTAATTGCAATAGCCATAGTCGCAGTCCTTTTAGTCCTGACCTGCTGCTTTTGTATCTGTAAGAAATGTTTGTTCAAAAAGAAAAACAAGAAGAAGGGAAAGGAAAAAGGAGGGAAGAATGCCATTAACATGAAAGATGTAAAAGACTTAGGGAAGACGATGAAAGATCAGGCCCTCAAGGATGATGATGCTGAAACTGGATTGACAGATGGA…
Syt7-RFP	GAATTCATGTACCGGGACCCGGAGGCGGCCAGCCCAGGGGCGCCCTCGCGCGACGTCCTGCTGGTCTCTGCCATCATCACCGTCAGCCTTAGCGTCACTGTCGTCCTCTGCGGCCTCTGCCACTGGTGTCAGCGCAAACTGGGCAAACGCTACAAAAATTCCTTGGAGACGGTGGGCACGCCAGACTCAGGGCGTGGGCGCAGTGAGAAGAAGGCTATCAAGTTGCCTGCAGGAGGGAAGGCGGTGAACACAGCCCCCGTGCCAGGCCAGACACCCCACGATGAGTCCGACCGCCGGACCGAGCCACGTTCCTCCGTCTCAGACCTCGTCAACTCCCTCACCAGCGAGATGCTCATGCTCTCCCCAGGCTCCGAGGAGGATGAGGCCCACGAGGGTTGC…
